# Supplementary material for: Pseudo rotary resonance relaxation dispersion effects in isotropic samples
Source: Copernicus journal article supplement (doi:10.5194/mr-6-119-2025), 2025-06-03
Supplement: Supplementary file 1 [file mr-6-119-2025-supplement.zip]

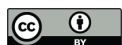

## *Supplement of*

# **Pseudo rotary resonance relaxation dispersion effects in isotropic samples**

**Evgeny Nimerovsky et al.**

*Correspondence to:* Evgeny Nimerovsky (evni@mpinat.mpg.de) and Loren B. Andreas (land@mpinat.mpg.de)

- mr-6-119-2025-supplement-title-page.pdf
- MALTLAB\_codes
  - 100.dat
  - ID.m
  - pseudo\_RRD\_comparison\_with\_FOH.m
  - pseudo\_RRD\_spin\_lock\_profiles\_B0\_B1\_modulations.m
- pseudoRRD\_revII\_SI.pdf

The copyright of individual parts of the supplement might differ from the article licence.
